# Supplementary material
Source: PubMed Central journal article supplement (PMC3582381)
Supplement: NIHMS388713-supplement-01.pdf [file NIHMS388713-supplement-01.pdf]

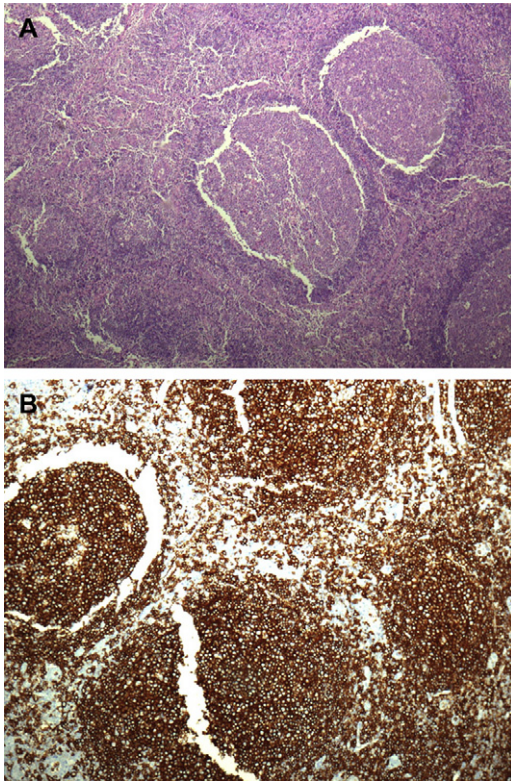

**FIG E1.** **A**, Lymph node (left axilla) shows marked follicular lymphoid hyperplasia with prominent germinal centers (hematoxylin and eosin stain, original magnification  $\times 20$ ). **B**, The same lymph node. A CD20 immunohistochemistry stain specific for B cells (Novocastra, Newcastle Upon Tyne, United Kingdom) shows dense staining (CD20 marker, immunohistochemical stain, original magnification  $\times 20$ ).

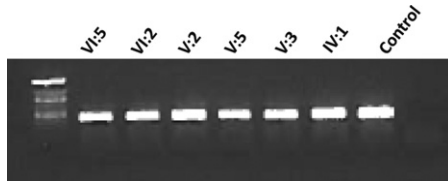

**FIG E2.** RT-PCR analysis shows no evidence of significant nonsense-mediated decay affecting the aberrant *LRBA* transcript in patients because it appears to have comparable abundance with the normal transcript seen in control subjects.
